# Supplementary material for: New Insights into the Hepcidin-Ferroportin Axis and Iron Homeostasis in iPSC-Derived Cardiomyocytes from Friedreich's Ataxia Patient
Source: Oxid Med Cell Longev. 2019 Mar 27;2019:7623023. doi: 10.1155/2019/7623023 (PMC6458886; doi:10.1155/2019/7623023)
Supplement: Supplementary 1 — Table S1: phenotypic data of control subject and FRDA patient from which iPSCs were generated by Coriell Institute Repositories. Table S2: list of primary and secondary antibodies used in cytofluorimetry (FACS), immunofluorescence (IF), and Western blot (WB) analysis. Table S3: primer sequences and amplicon length of the genes analyzed by real-time PCR in iPSC-derived cardiomyocytes. β-Actin and GADPH were used as housekeeping genes. [file 7623023.f1.pdf]

## SUPPLEMENTARY MATERIALS AND METHODS

### 1. Cardiomyocytes derivation from hiPSCs

The iPSC colonies were grown in 6-well dishes on irradiated mouse embryonic fibroblasts (GlobalStem, Rockville, MD) in DMEM/F-12 with 20% KnockOut serum replacement, 1 mM glutamine, 1% non-essential amino acids, 1% penicillin/streptomycin, 0.1 mM Beta-mercaptoethanol (Life Technologies, USA), 20 or 30 ng/mL basic FGF (Stemgent, San Diego, CA) and were passaged manually every 7 or 8 days. When iPSC colonies reached confluency, they were dissociated with Versene (Life Technologies, USA) and were growth on Matrigel-coated plates in mTeSr1 medium (STEM CELLS, Technologies, USA) with 5  $\mu$ M ROCK inhibitor (Y27632, Miltenyi Biotec, Germany). Following confluency in the feeder-free condition, iPSC colonies were detached with Accutase (Life Technologies, USA) and then replated on a 12-well Matrigel-coated dish in mTeSr1 medium with 5  $\mu$ M ROCK inhibitor (Y27632) (Miltenyi Biotec, Germany) at different cell densities: 0.5, 0.75 or 1 milion cells/mL for four days. Induction was performed with 12  $\mu$ M CHIR99021 (Selleckchem, USA) in RPMI medium supplemented with B27-insulin (Life Technologies, USA). Twenty-four hours later, the medium was substituted with RPMI with B27-insulin. The following day, the medium was substituted with 2 mL of a medium made up of 1 mL of the medium collected from the well and 1 mL of fresh RPMI with B27-insulin, to which 5  $\mu$ M IWP2 (Tocris, Bioscience, USA) was added. This medium was replaced two days later with RPMI with B27-insulin. Two days later, RPMI with B27 was substituted in the wells. First beating areas are expected to form between the 9<sup>th</sup> and the 12<sup>th</sup> day from the culture in mTeSr1 medium. Cardiomyocytes with spontaneously beating area were maintained in RPMI/ B27 medium until the 20<sup>th</sup> day of induction.

## SUPPLEMENTARY TABLES

**Table S1:** phenotypic data of control subject and FRDA patient from which iPSCs were generated by Coriell Institute Repositories.

| CODE      | Gender | Age (Years) | GAA length repeats | Phenotypic Data                               |
|-----------|--------|-------------|--------------------|-----------------------------------------------|
| GM23280*A | ♀      | 36          |                    | Apparently healthy                            |
| GM23404*B | ♀      | 36          | 330-380            | Spinal-cerebral degeneration; myocardiopathy. |

**Table S2:** list of primary and secondary antibodies used in cytofluorimetry (FACS), immunofluorescence (IF) and Western Blot (WB) analysis

| <b>Antibody</b>                                                   | <b>Species</b>    | <b>Dilution</b>              |
|-------------------------------------------------------------------|-------------------|------------------------------|
| Anti-Hepcidin, Abcam (Ab30760)                                    | Rabbit polyclonal | 1:100 for WB<br>1:100 for IF |
| Anti-Ferroportin/SLC40A1, Novus biologicals<br>(NBP1-21502)       | Rabbit polyclonal | 1:500 for WB<br>1:500 for IF |
| Cardiac Troponin T, Thermo Fisher Scientific<br>(ms-295-p1/13-11) | Mouse IgG1        | 1:200 for FACS<br>and IF     |
| MF 20, DSHB                                                       | Mouse IgG2b       | 1:20 for IF                  |
| Alexa 488 Goat, Life Technologies (A-21121)                       | Mouse IgG1        | 1:1000 for FACS<br>and IF    |
| Alexa 594 Goat, Life Technologies (A-21145)                       | Mouse IgG2b       | 1:1000 for IF                |
| Anti-Rabbit IgG-FITC, Sigma (F7512)                               | Rabbit IgG        | 1:200 for IF                 |
| Anti-Rabbit IgG-HRP, Thermo Fisher Scientific<br>(31460)          | Rabbit IgG        | 1:10000 for WB               |

**Table S3:** primer sequences and amplicon length of the genes analysed by real-time PCR in iPSC-derived cardiomyocytes.  $\beta$ -Actin and GAPDH were used as housekeeping genes.

| GENE                              | NCBI RefSeqs*  | LEFT PRIMER           | RIGHT PRIMER          | A.L. (bp)** |
|-----------------------------------|----------------|-----------------------|-----------------------|-------------|
| $\beta$ -Actin                    | NM_0011013     | agacctgtacgccaacacagt | agtacttgcgctcaggagga  | 140         |
| GAPDH                             | NM_002046      | cctgacctgccgtctagaaa  | tgctgtagccaaattcgttg  | 233         |
| Frataxin (FXN)                    | NM_000144      | tagcagaggaaacgctggac  | gatttgctgtttggcgtct   | 170         |
| Hepcdin (HAMP)                    | NM_021175.2    | gaccagtggctctgtttcc   | cacatccacactttgatcg   | 430         |
| ATOH8                             | NM_032827      | caagaagcgcaaggagtgc   | gcattcttgagaagaccacga | 125         |
| Ferritin (FTH1)                   | NM_002032.2    | ctggccactgacaaaaatga  | cagggtgtgctgtcaaaga   | 168         |
| Ferroportin (FPN)                 | NM_014585.5    | cgtcattgctgctagaatcg  | ccaggatgacatgatgaaa   | 300         |
| Transferrin Receptor (TFRC)       | NM_001128148.1 | aaaatccggtgtaggcacag  | ttaaatgcaggagcgaagg   | 420         |
| Actinin 2                         | NM_001103.3    | ccgcattatgacctggttag  | gatgcagtactggcctgat   | 205         |
| GATA4                             | NM_001308093.1 | tgccctgtcatctcactacg  | aagaccaggctgtccaaga   | 192         |
| SIRPA                             | NM_001040022.1 | agcaaaagccatgacctgaa  | cctgggctttcttctgtctg  | 184         |
| Troponin T2, cardiac type (TNNT2) | NM_000364.3    | tccgaacaggatcaacgat   | ccatttccaaacaggagctg  | 190         |

\*NCBI RefSeqs= NCBI Reference Sequences

\*\*A.L. (bp) =Amplicon length (base pair)

**SUPPLEMENTARY FIGURES**

**Figure S1:** timeline of iPSC-derived cardiomyocyte differentiation protocol

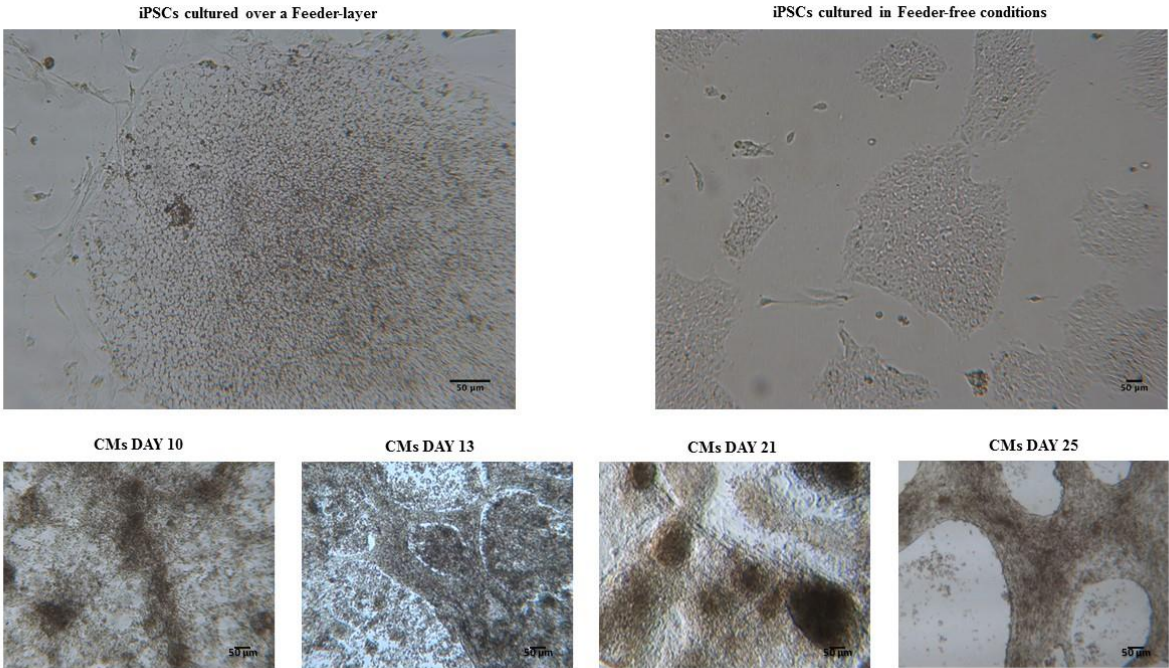

## **SUPPLEMENTARY VIDEO CAPTIONS**

**SM1:** CTR Cardiomyocytes

**SM2:** FRDA Cardiomyocytes
